# Supplementary material
Source: ML conference proceedings conference paper supplement (https://openaccess.thecvf.com/content/CVPR2024/html/Zheng_PKU-DyMVHumans_A_Multi-View_CVPR_2024_paper.html)
Supplement: Supplementary file 1 [file Zheng_PKU-DyMVHumans_A_Multi-View_CVPR_2024_supplemental.pdf]

# PKU-DyMVHumans: A Multi-View Video Benchmark for High-Fidelity Dynamic Human Modeling

## Supplementary Material

This supplementary material presents more details and additional results not included in the main paper due to page limitation. The list of items included are:

- More dataset information in Sec. A, including visualizations of data samples, and per-category data distribution;
- Additional experimental details are provided in Sec. B. These include implementation details of neural scene decomposition, additional visualizations and quantitative results of novel view synthesis, as well as more evaluation results on dynamic human modeling.

### A. Additional Dataset Information

#### A.1. More Visualizations of Data Samples

Fig. 1 presents an overview of the sample for each scene in PKU-DyMVHumans. It can be seen that each sample has a distinct texture, motion, and interactions, covering a wide range of fundamental and complex dynamic performances. As shown in Fig. 2 and Fig. 3, a set of multi-view images is illustrated for the 1080P and 4K Studio sequences category, respectively. It clearly shows the differences between each view and provides comprehensive categories in our dataset.

#### A.2. Per-category Data Distribution

PKU-DyMVHumans contains a massive scale of subjects (32), scene (45), sequences (2,668) and frames (8.2M). We provide a full scene distribution with the number of frames for each action category in Fig. 4.

### B. Additional Experimental Details

#### B.1. Neural Scene Decomposition

**Method overview.** For the scene captured by multi-view images, we use COLMAP [3] and BGMv2 [1] to get sparse 3D points and coarse object masks as co-inputs, and predict a dense, geometrical consistent object map, as well as a textural, completed background for each image. Fig. 5 shows an overview of our contemporary work Surface-SOS [7], in which multi-view geometric constraints are embedded in the form of dense one-to-one mapping in 3D surface representation. By connecting SDF-based surface representation to geometric consistency, and applying volume rendering to train the network with robustness, it can reconstruct the foreground object geometry and appearance over time.

**Implementation details.** To train Surface-SOS [7], we introduce photometric and geometric losses to supervise the training process, with the multi-view images serving as the

primary supervision signal. Our objective is to achieve fine-grained object segmentation and analyze the correlation between the neural surface representation and object segmentation. In this study, we evaluate two approaches: NeRF-based segmentation, which does not introduce the normal to regularize the output SDF implicitly, and SDF-based segmentation, which provides the SDF-based surface representation for cross-view geometric constraints.

**3D Segmentation of scenes with a single/multiple foreground object.** As shown in Fig. 6, Surface-SOS successfully refines the segmentation remarkably using two neural representation models. When the normal is not introduced to implicitly regularize the output SDF (i.e., NeRF-based segmentation), it often produces noisy segmentation. However, when providing the SDF-based surface representation, the network is able to learn 3D geometry implicitly and generate an accurate foreground decomposition. These examples demonstrate that accurate prediction of object geometry with SDF-based surface representation is beneficial for object segmentation.

#### B.2. Novel View Synthesis

We conducted an additional experiment on the remaining scenes in PKU-DyMVHumans dataset. The complete quantitative comparisons are presented in Tab. 1. Additionally, we present additional qualitative comparisons in Fig. 7, Fig. 8, Fig. 9, Fig. 10, and Fig. 11. Consistent with the results in the main paper, PKU-DyMVHumans dataset offers a wide range of shapes and appearances, providing a comprehensive foundation for evaluating various methods for novel view synthesis in terms of human performance.

#### B.3. Dynamic Human Modeling

**More Analyses of Dynamic Human Modeling.** Free-viewpoint rendering of a moving subject from a monocular self-rotating video is a complex yet desirable setup. In the 4K Studio sequences category, we provide monocular self-rotating videos of human performers. These videos demonstrate the versatility of our dataset in synthesizing novel views of dynamic humans from fixed monocular cameras. To further illustrate this, we conducted additional experiments using HumanNeRF [6] baseline, a free-viewpoint rendering method for a moving subject. We selected 4 scenes from the 4K Studio sequences category with diverse motions and appearances and used images captured by camera 27, resulting in sequences ranging from 250 to 300.

We provide four visual examples of our challenging sce-

Table 1. Results of per-scene novel view synthesis on 4 action categories.

| Action Type    | Scenes                             | NeuS [4]        |                 |                    | Instant-NGP [2] |                 |                    | NeuS2 [5]       |                 |                    |
|----------------|------------------------------------|-----------------|-----------------|--------------------|-----------------|-----------------|--------------------|-----------------|-----------------|--------------------|
|                |                                    | PSNR $\uparrow$ | SSIM $\uparrow$ | LPIPS $\downarrow$ | PSNR $\uparrow$ | SSIM $\uparrow$ | LPIPS $\downarrow$ | PSNR $\uparrow$ | SSIM $\uparrow$ | LPIPS $\downarrow$ |
| Dance          | 1080_Dance_Dunhuang_Pair_f14f15    | 21.38           | 0.959           | 0.042              | 26.37           | 0.974           | 0.035              | 25.34           | 0.967           | 0.044              |
|                | 1080_Dance_Dunhuang_Single_f12     | 25.19           | 0.978           | 0.024              | 31.46           | 0.983           | 0.019              | 30.61           | 0.985           | 0.020              |
|                | 1080_Dance_Dunhuang_Single_f13     | 25.37           | 0.979           | 0.021              | 33.91           | 0.989           | 0.013              | 31.31           | 0.984           | 0.016              |
|                | 1080_Dance_Dunhuang_Single_f14     | 25.03           | 0.977           | 0.025              | 32.02           | 0.988           | 0.016              | 30.34           | 0.985           | 0.016              |
|                | 1080_Dance_Dunhuang_Single_f15     | 25.61           | 0.978           | 0.029              | 34.91           | 0.992           | 0.014              | 32.27           | 0.990           | 0.016              |
|                | 1080_Dance_Jazz_Single_c22         | 26.59           | 0.984           | 0.018              | 31.41           | 0.987           | 0.011              | 35.38           | 0.991           | 0.010              |
|                | 1080_Dance_Tibetan_Single_c22      | 26.26           | 0.984           | 0.020              | 33.69           | 0.991           | 0.016              | 34.28           | 0.990           | 0.014              |
|                | 1080_Dance_Banquet_Single_c23      | 26.73           | 0.984           | 0.016              | 36.20           | 0.993           | 0.009              | 35.56           | 0.993           | 0.009              |
| <b>Average</b> |                                    | 25.27           | 0.978           | 0.024              | <b>32.50</b>    | <b>0.987</b>    | <b>0.017</b>       | 31.90           | 0.986           | 0.018              |
| Kungfu         | 1080_Kungfu_Weapon_Pair_m12m13     | 19.51           | 0.941           | 0.061              | 22.31           | 0.955           | 0.014              | 22.07           | 0.962           | 0.048              |
|                | 1080_Kungfu_Double_Pair_m12m13     | 18.48           | 0.939           | 0.062              | 20.42           | 0.948           | 0.144              | 22.45           | 0.965           | 0.047              |
|                | 1080_Kungfu_Basic_Pair_c24c25      | 25.48           | 0.979           | 0.024              | 31.96           | 0.989           | 0.017              | 30.99           | 0.986           | 0.019              |
|                | 1080_Kungfu_Fan_Single_m12         | 25.72           | 0.981           | 0.024              | 33.16           | 0.988           | 0.021              | 30.56           | 0.985           | 0.021              |
|                | 1080_Kungfu-Taichi_Single_m12      | 22.16           | 0.976           | 0.027              | 30.94           | 0.988           | 0.020              | 29.60           | 0.986           | 0.020              |
|                | 1080_Kungfu_Shaolin_Single_m12     | 23.01           | 0.978           | 0.029              | 31.85           | 0.989           | 0.017              | 32.08           | 0.989           | 0.016              |
|                | 1080_Kungfu_Sword_Single_m13       | 23.24           | 0.978           | 0.023              | 31.10           | 0.986           | 0.019              | 29.39           | 0.985           | 0.019              |
|                | 1080_Kungfu_Spear_Single_m13       | 22.53           | 0.973           | 0.033              | 31.85           | 0.989           | 0.018              | 28.16           | 0.985           | 0.021              |
|                | 1080_Kungfu_Kick_Single_m13        | 20.16           | 0.970           | 0.032              | 29.43           | 0.986           | 0.032              | 28.68           | 0.987           | 0.024              |
|                | 1080_Kungfu_Basic_Single_m13       | 23.17           | 0.978           | 0.021              | 28.18           | 0.982           | 0.024              | 28.53           | 0.985           | 0.019              |
|                | 1080_Kungfu_Tongbeiquan_Single_m13 | 23.59           | 0.980           | 0.024              | 32.19           | 0.991           | 0.016              | 31.61           | 0.988           | 0.017              |
|                | 1080_Kungfu_Nunchuck_Single_m14    | 21.21           | 0.976           | 0.024              | 29.62           | 0.985           | 0.046              | 28.32           | 0.984           | 0.022              |
|                | 1080_Kungfu_Nanquan_Single_c24     | 25.81           | 0.983           | 0.026              | 37.62           | 0.995           | 0.013              | 34.67           | 0.993           | 0.014              |
|                | 1080_Kungfu_Broadsword_Single_c24  | 25.65           | 0.985           | 0.018              | 35.28           | 0.993           | 0.014              | 37.24           | 0.994           | 0.009              |
|                | 1080_Kungfu_Boxing_Single_c25      | 24.31           | 0.981           | 0.024              | 38.37           | 0.996           | 0.009              | 36.91           | 0.995           | 0.009              |
| <b>Average</b> |                                    | 22.94           | 0.973           | 0.030              | <b>30.95</b>    | 0.984           | 0.028              | 30.08           | <b>0.985</b>    | <b>0.022</b>       |
| Sport          | 1080_Sport_Football_Single_m11     | 24.91           | 0.983           | 0.017              | 29.83           | 0.982           | 0.018              | 30.50           | 0.986           | 0.016              |
|                | 1080_Sport-Taekwondo1_Pair_m11c21  | 23.72           | 0.970           | 0.037              | 32.50           | 0.989           | 0.019              | 27.12           | 0.981           | 0.029              |
|                | 1080_Sport_Badminton_Single_f11    | 25.22           | 0.980           | 0.028              | 34.29           | 0.993           | 0.011              | 33.79           | 0.993           | 0.014              |
|                | <b>Average</b>                     |                 | 24.62           | 0.977              | 0.028           | <b>32.20</b>    | <b>0.988</b>       | <b>0.016</b>    | 30.47           | 0.987              |
| Fashion Show   | 4K_Studios_Show_Pair_f16f17        | 23.26           | 0.977           | 0.036              | 35.02           | 0.991           | 0.020              | 32.12           | 0.987           | 0.025              |
|                | 4K_Studios_Show_Pair_f18f19        | 22.80           | 0.976           | 0.031              | 34.24           | 0.993           | 0.016              | 32.23           | 0.992           | 0.014              |
|                | 4K_Studios_Show_Single_f16         | 20.38           | 0.975           | 0.042              | 34.49           | 0.990           | 0.012              | 34.33           | 0.993           | 0.012              |
|                | 4K_Studios_Show_Single_f17         | 23.07           | 0.982           | 0.036              | 35.08           | 0.992           | 0.021              | 34.11           | 0.992           | 0.018              |
|                | 4K_Studios_Show_Single_f18         | 22.95           | 0.983           | 0.027              | 36.73           | 0.995           | 0.012              | 34.32           | 0.994           | 0.013              |
|                | 4K_Studios_Show_Single_f19         | 24.36           | 0.986           | 0.024              | 38.94           | 0.996           | 0.010              | 37.03           | 0.995           | 0.011              |
|                | 4K_Studios_Dance_Single_f20        | 22.67           | 0.981           | 0.028              | 30.50           | 0.986           | 0.026              | 31.67           | 0.989           | 0.018              |
|                | <b>Average</b>                     |                 | 22.79           | 0.980              | 0.032           | <b>35.00</b>    | <b>0.992</b>       | 0.017           | 33.69           | <b>0.992</b>       |
| <b>Average</b> |                                    | 23.90           | 0.977           | 0.029              | <b>32.66</b>    | <b>0.988</b>    | <b>0.019</b>       | 31.53           | 0.987           | <b>0.019</b>       |

nario dataset in Fig. 12. While body pose and non-rigid motion were not completely recovered, as the movement of the skirts relied on the temporal dynamics of subject motion. We hope the result points in a promising direction towards modeling humans in complex poses and clothing, and eventually achieving fully photorealistic, freeviewpoint rendering of moving people.

## References

- [1] Shanchuan Lin, Andrey Ryabtsev, Soumyadip Sengupta, Brian L. Curless, Steven M. Seitz, and Ira Kemelmacher-Shlizerman. Real-time high-resolution background matting. In *Proceedings of the IEEE/CVF Conference on Computer Vision and Pattern Recognition (CVPR)*, pages 8762–8771, 2021. 1
- [2] Thomas Müller, Alex Evans, Christoph Schied, and Alexander Keller. Instant neural graphics primitives with a multi-resolution hash encoding. *ACM Trans. Graph.*, 41(4):102:1–102:15, 2022. 2
- [3] Johannes L Schonberger and Jan-Michael Frahm. Structure-from-motion revisited. In *Proceedings of the IEEE conference on computer vision and pattern recognition*, pages 4104–4113, 2016. 1
- [4] Peng Wang, Lingjie Liu, Yuan Liu, Christian Theobalt, Taku Komura, and Wenping Wang. NeuS: Learning neural implicit surfaces by volume rendering for multi-view reconstruction. In *Proc. Advances in Neural Information Processing Systems (NeurIPS)*, pages 27171–27183, 2021. 2
- [5] Yiming Wang, Qin Han, Marc Habermann, Kostas Daniilidis, Christian Theobalt, and Lingjie Liu. NeuS2: Fast learning of neural implicit surfaces for multi-view reconstruction. In *Proceedings of the IEEE/CVF International Conference on Computer Vision (ICCV)*, 2023. 2
- [6] Chung-Yi Weng, Brian Curless, Pratul P Srinivasan, Jonathan T Barron, and Ira Kemelmacher-Shlizerman. Humanerf: Free-viewpoint rendering of moving people from monocular video. In *Proceedings of the IEEE/CVF conference on computer vision and pattern Recognition*, pages 16210–16220, 2022. 1, 11
- [7] Xiaoyun Zheng, Liwei Liao, Jianbo Jiao, Feng Gao, and Ronggang Wang. Surface-sos: Self-supervised object segmentation via neural surface representation. *IEEE Transactions on Image Processing*, 33:2018–2031, 2024. 1, 5



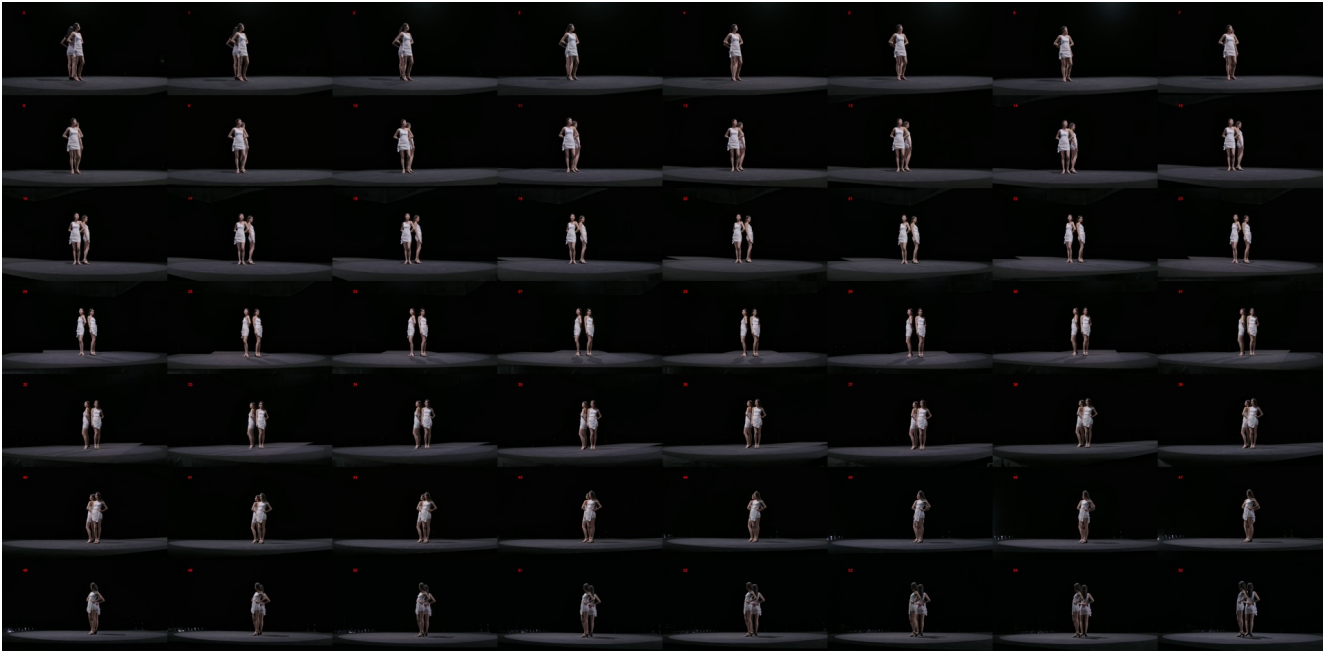

Figure 3. A set of example multi-view images in the 4K Studio sequences (4K\_Studios\_Show\_Pair\_f18f19).

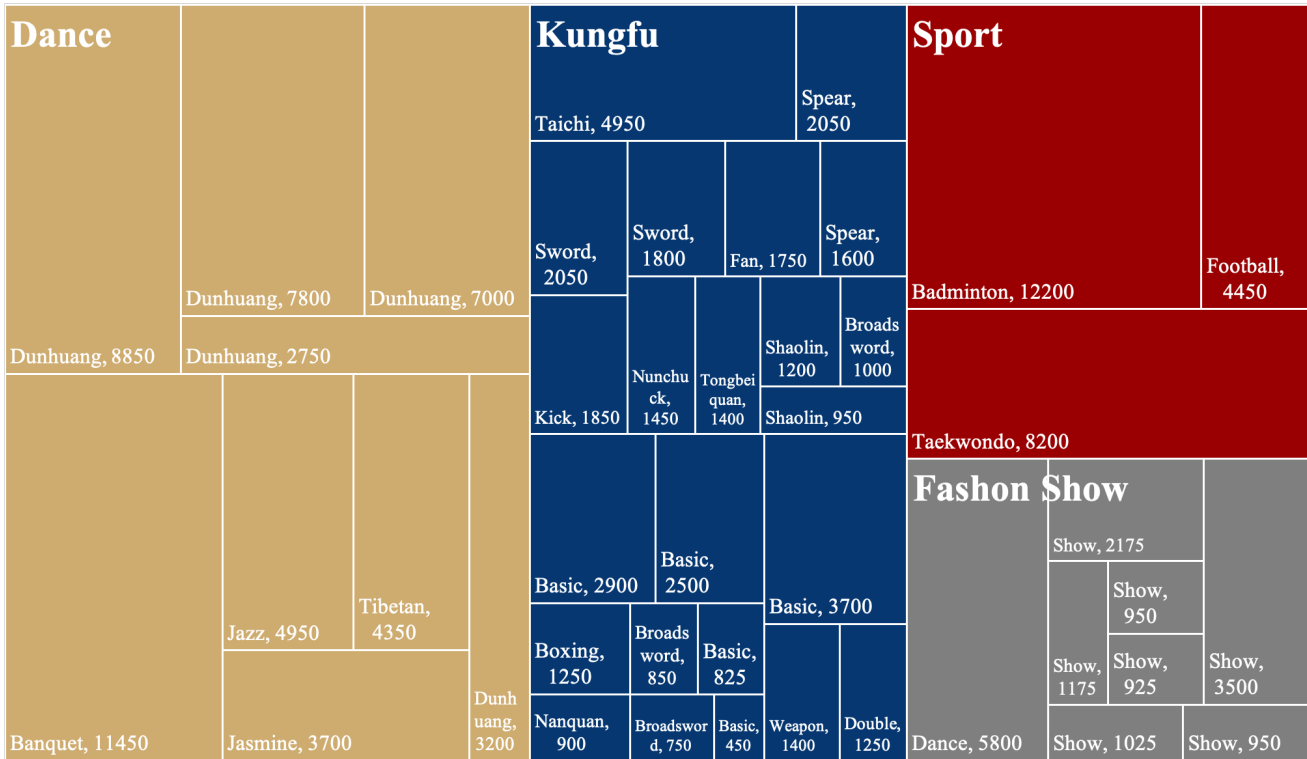

Figure 4. A scene list that provides a detailed breakdown of the number of frames in each category.



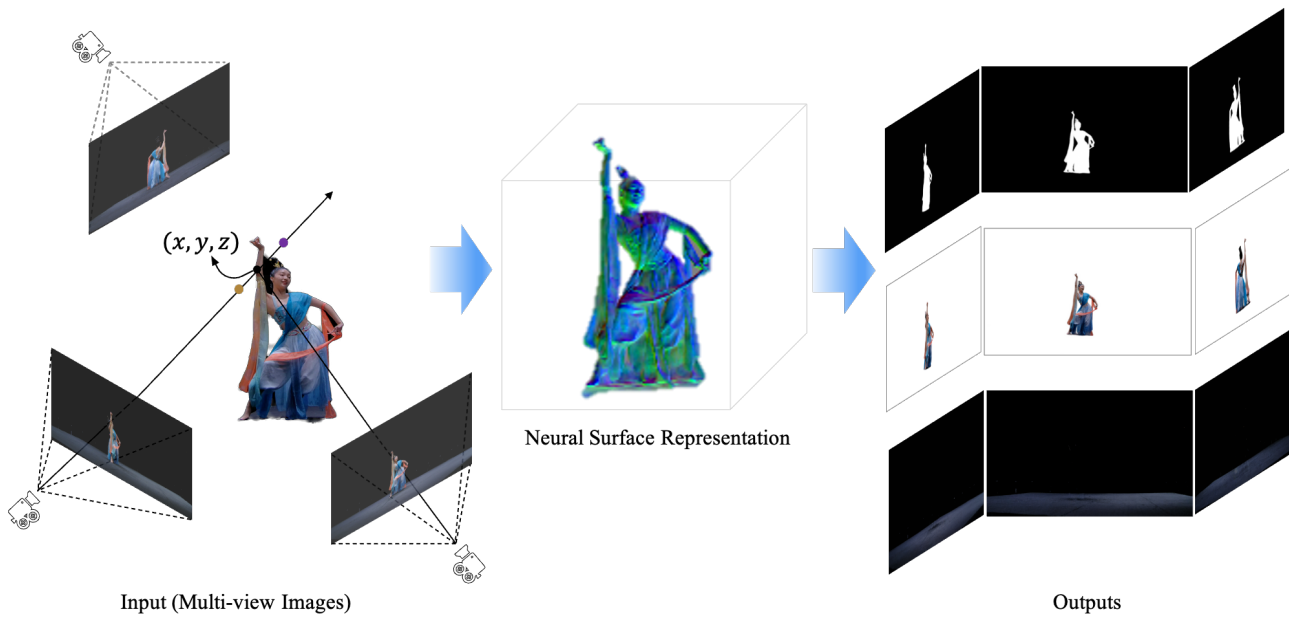

Figure 5. Surface-SOS [7], a self-supervised learning framework towards delicate segmentation by combining 3D neural surface representation power from multi-view images of a scene.

|               | Input image | Input coarse mask | NeRF-based Segmentation | SDF-based Segmentation |
|---------------|-------------|-------------------|-------------------------|------------------------|
| Single-object |             |                   |                         |                        |
|               |             |                   |                         |                        |
|               |             |                   |                         |                        |
| Multi-objects |             |                   |                         |                        |
|               |             |                   |                         |                        |
|               |             |                   |                         |                        |

Figure 6. Qualitative comparison on 3D segmentation of scenes with a single/multiple foreground object.

Reference Image

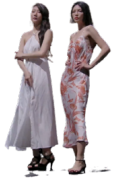

NeuS

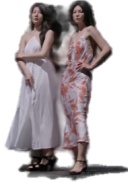

Instant-NGP

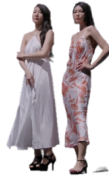

NeuS2

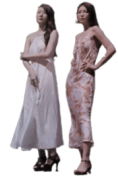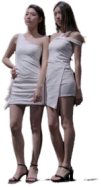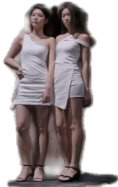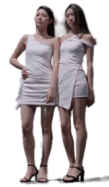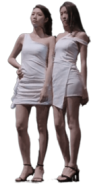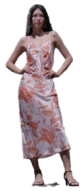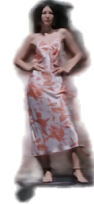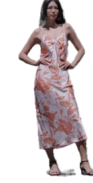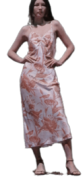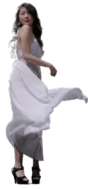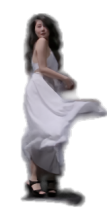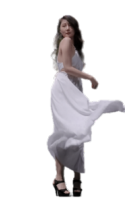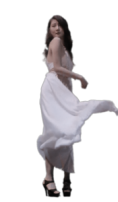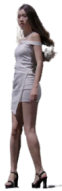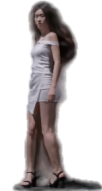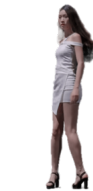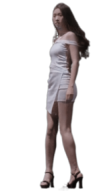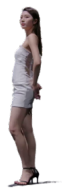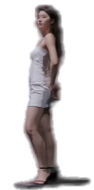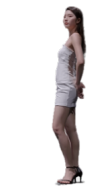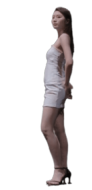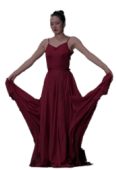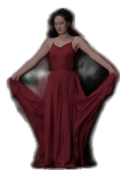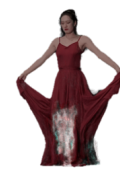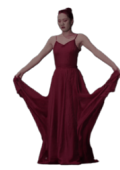

Figure 7. More visualizations results of scene sample (4K Studios).

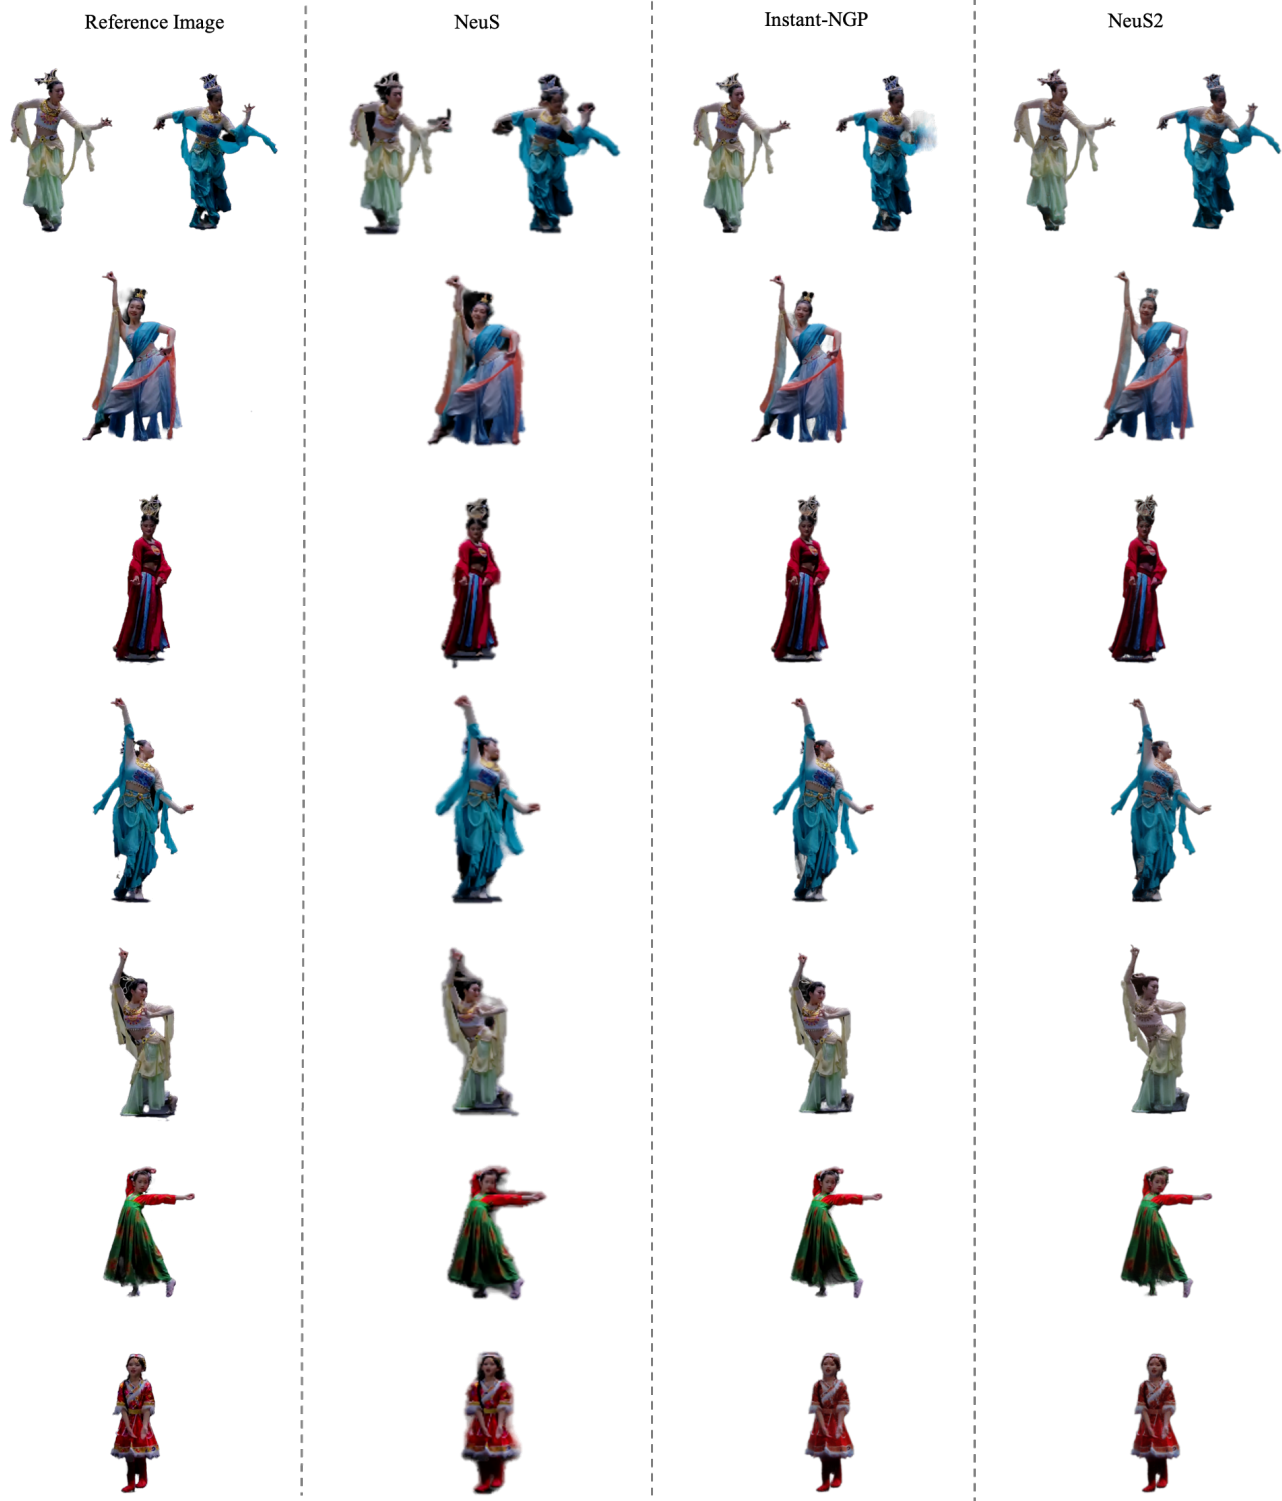

Figure 8. More visualizations results of scene sample (dance).

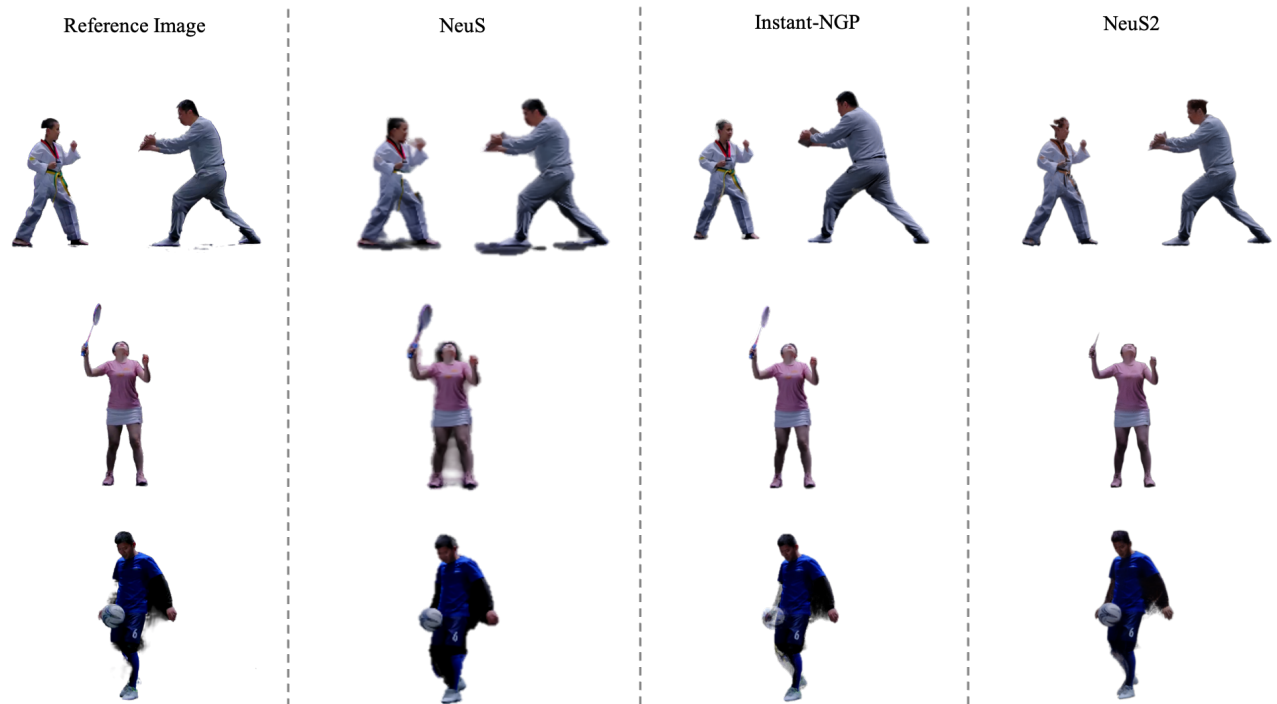

Figure 9. More visualizations results of scene sample (sport).

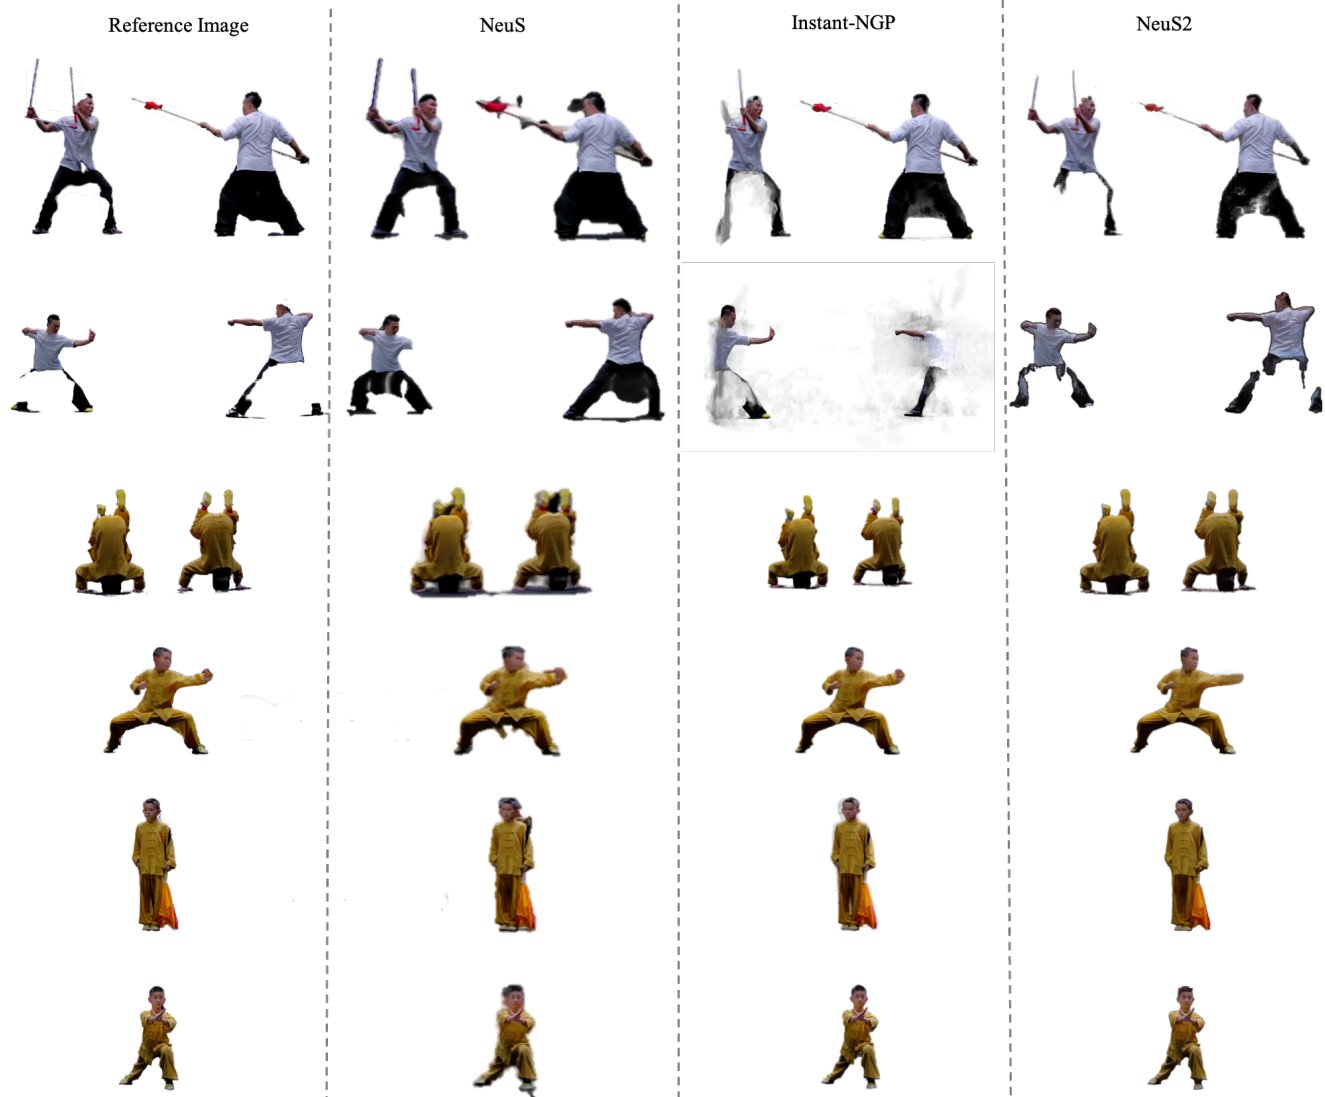

Figure 10. More visualizations results of scene sample (kungfu).



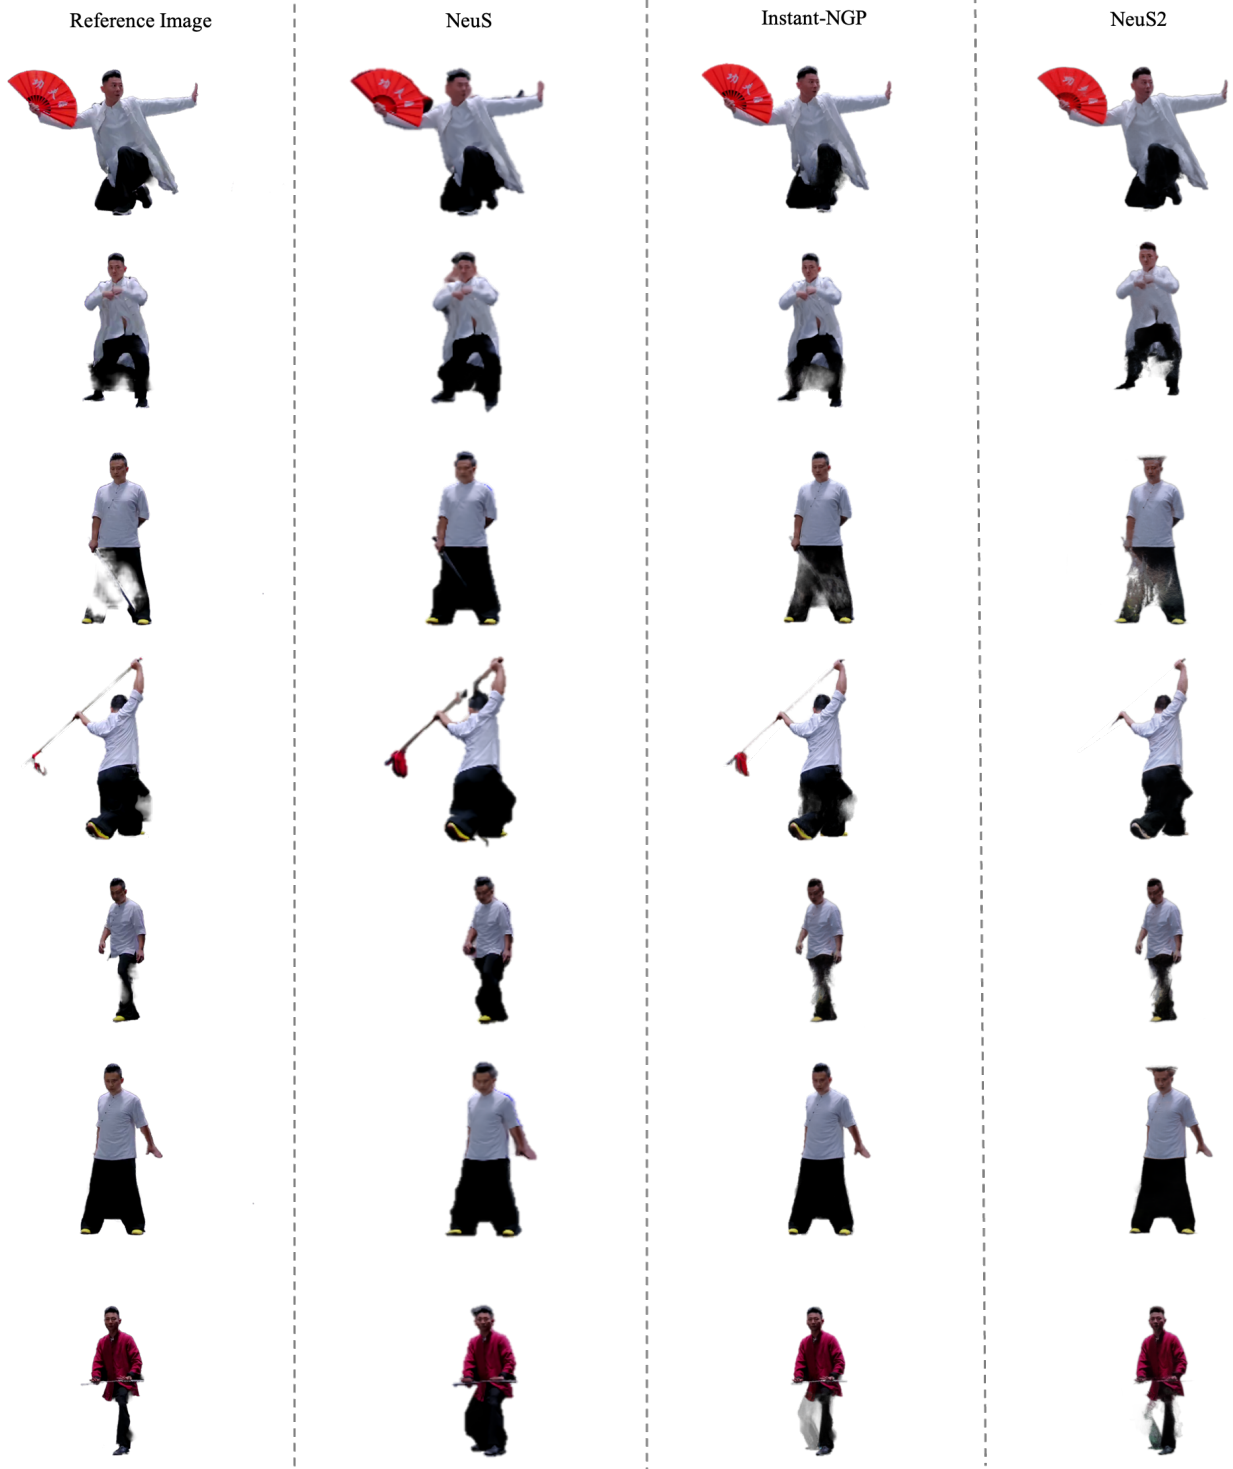

Figure 11. More visualizations results of scene sample (kungfu).

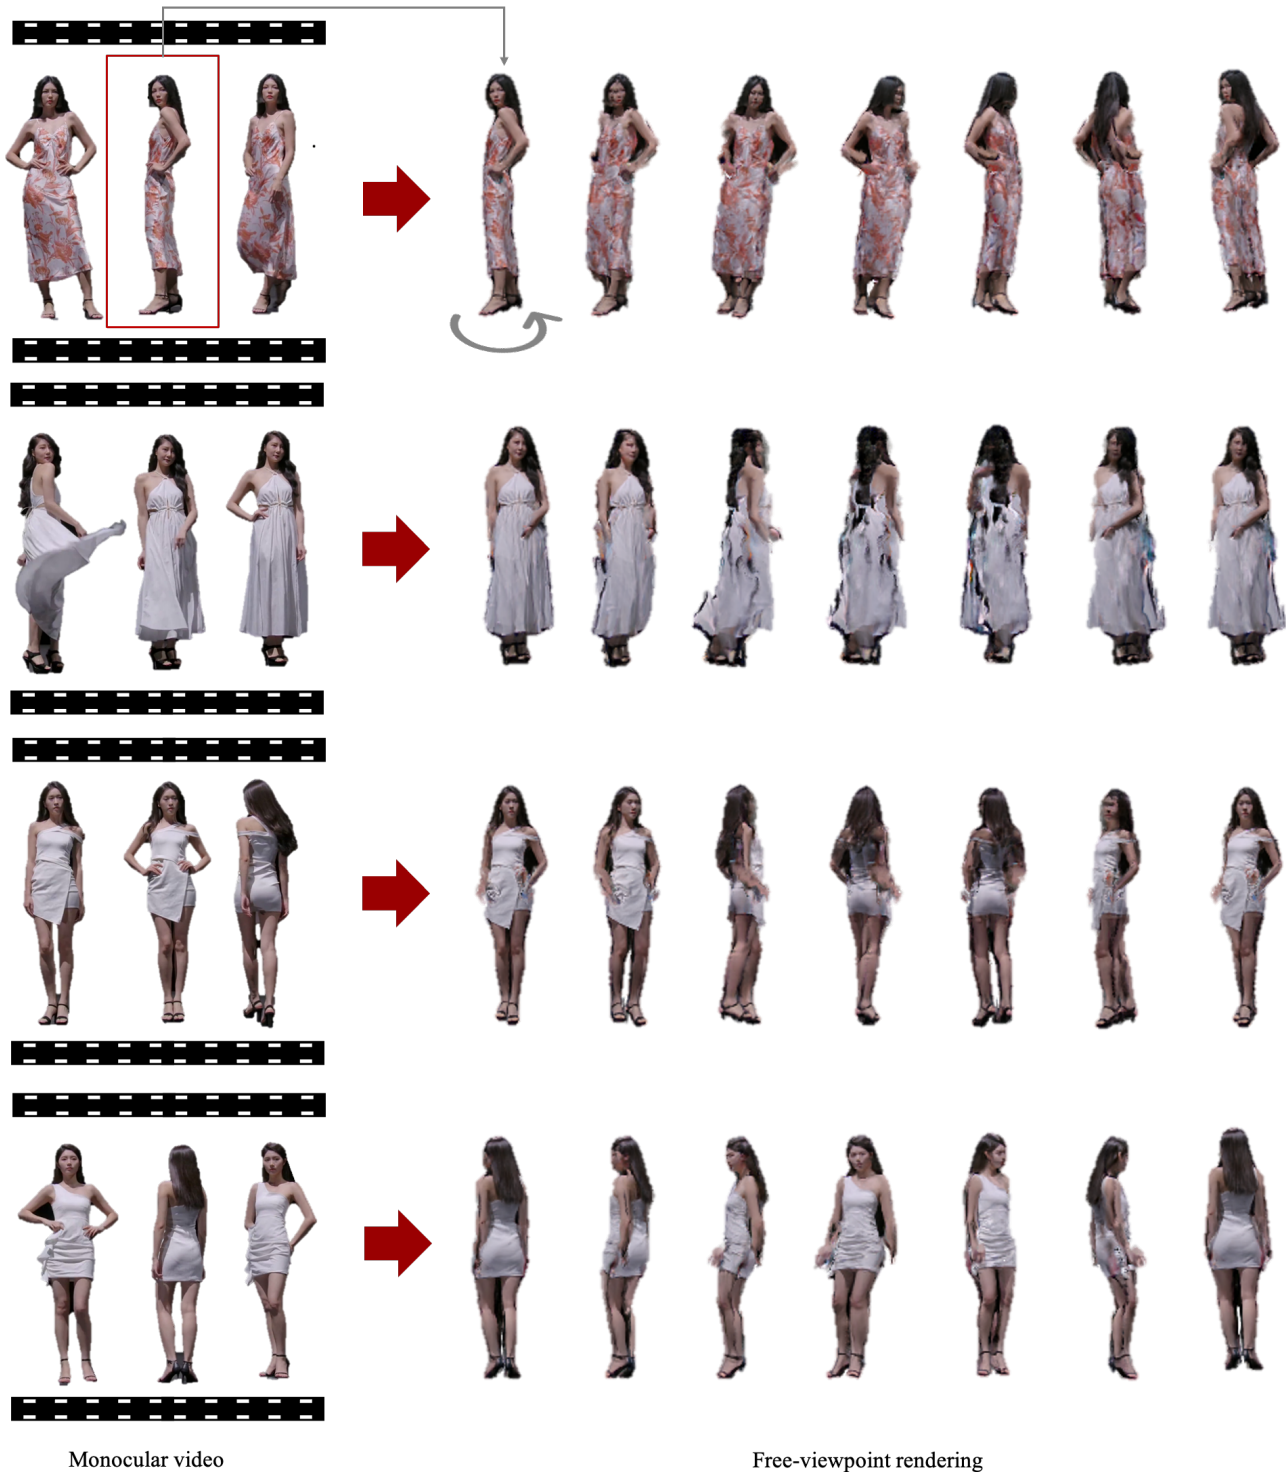

Figure 12. Visual examples of free view synthesis on the four scenes data are provided. The input is a monocular video capturing a human performing complex movements (left). The HumanNeRF [6] generates a free-viewpoint rendering for any frame in the sequence (right).
